# Supplementary material
Source: PubMed Central journal article supplement (PMC6717308)
Supplement: pnas.1907077116.sapp.pdf [file pnas.1907077116.sapp.pdf]

## Supplementary Information for:

**Title:** Upregulation of reduced folate carrier (RFC) by vitamin D enhances brain folate uptake in mice lacking folate receptor alpha (Folr1)

**Authors:** Camille Alam<sup>a</sup>, Susanne Aufreiter<sup>b</sup>, Constantine J. Georgiou<sup>a</sup>, Md. Tozammel Hoque<sup>a</sup>, Richard H. Finnell<sup>c</sup>, Deborah L. O'Connor<sup>b,d</sup>, I. David Goldman<sup>e</sup>, and Reina Bendayan<sup>a,1</sup>

### Author Affiliations:

<sup>a</sup>Department of Pharmaceutical Sciences, Leslie Dan Faculty of Pharmacy, University of Toronto, 144 College Street, Toronto, Ontario, Canada, M5S 3M2

<sup>b</sup>Translational Medicine Program, The Hospital for Sick Children, 686 Bay Street, Toronto, Ontario, Canada, M5G 0A4

<sup>c</sup>Departments of Molecular and Cellular Biology and Medicine, Baylor College of Medicine, 1 Baylor Plaza, Houston, Texas, USA, 77030

<sup>d</sup>Department of Nutritional Sciences, University of Toronto, 1 King's College Circle, Toronto, Ontario, Canada, M5S 1A8

<sup>e</sup>Departments of Medicine and Molecular Pharmacology, Albert Einstein College of Medicine, 1300 Morris Park Avenue, Bronx, New York, USA, 10461

<sup>1</sup>**Corresponding Author:** Reina Bendayan, Department of Pharmaceutical Sciences, Leslie Dan Faculty of Pharmacy, University of Toronto, 144 College Street, Room 1001, Toronto, Ontario, Canada M5S 3M2; Tel: 416-978-6979; Fax: 416-978-8511; E-mail: r.bendayan@utoronto.ca

### This PDF file includes:

Table S1

Figures S1 to S3

**Table S1.** Pharmacokinetic parameters for [<sup>13</sup>C<sub>5</sub>]-5-formylTHF in WT mice estimated from plasma concentration data fitted to a two-compartment single i.v. bolus pharmacokinetic model.

| <b>Pharmacokinetic Parameters</b> | <b>[<sup>13</sup>C<sub>5</sub>]-5-formylTHF</b> |
|-----------------------------------|-------------------------------------------------|
| $k_{12}$ (min <sup>-1</sup> )     | 0.055 ± 0.017                                   |
| $k_{21}$ (min <sup>-1</sup> )     | 0.036 ± 0.019                                   |
| $k_{10}$ (min <sup>-1</sup> )     | 0.221 ± 0.118                                   |
| V (ml/kg)                         | 396.34                                          |
| CL (ml/min/kg)                    | 87.76                                           |
| $t_{1/2\beta}$ (min)              | 25.01                                           |
| AUC <sub>0-∞</sub> (ng/ml • min)  | 2,849                                           |
| <b>Analysis of model fit</b>      |                                                 |
| WSS                               | 0.10                                            |
| R <sup>2</sup>                    | 0.98                                            |
| AIC                               | -6.13                                           |
| SC                                | -6.96                                           |

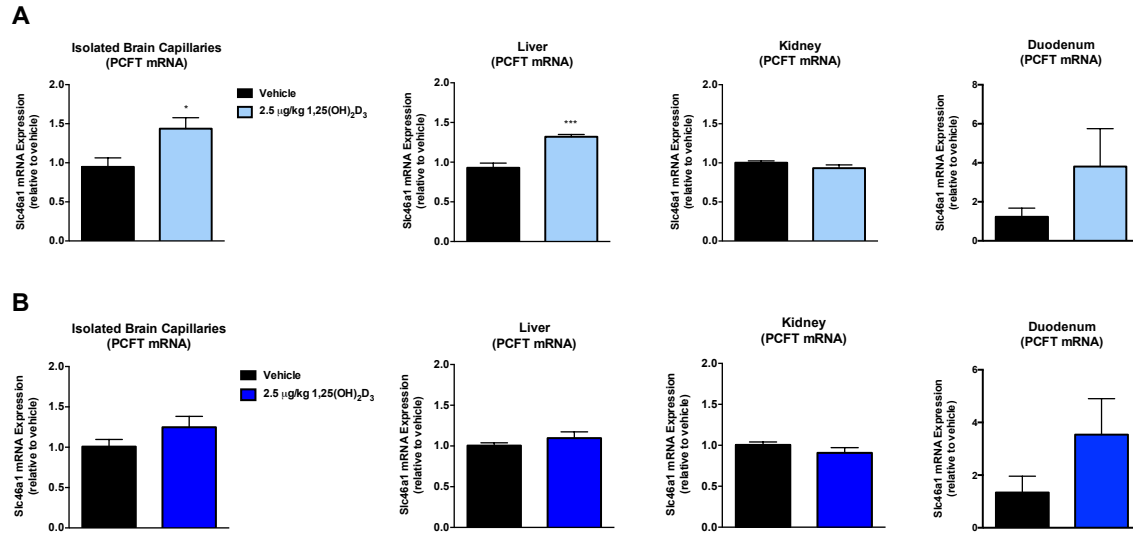

**Figure S1.** Effect of calcitriol treatment on PCFT expression. **(A)** Significant increases in *Slc46a1* (PCFT) mRNA was observed in isolated brain capillaries and liver of WT mice treated with calcitriol (2.5  $\mu\text{g/kg}$ ) compared to vehicle (corn oil). **(B)** There were no changes in *Slc46a1* (PCFT) mRNA following treatment of *Fcrl1* KO mice with calcitriol. Results are presented as mean  $\pm$  S.E.M. for  $n = 3$  independent experiments (total of 8-9 animals per group). Asterisks represent data point significantly different from vehicle (\*,  $p < 0.05$ ; \*\*\*,  $p < 0.001$ ).

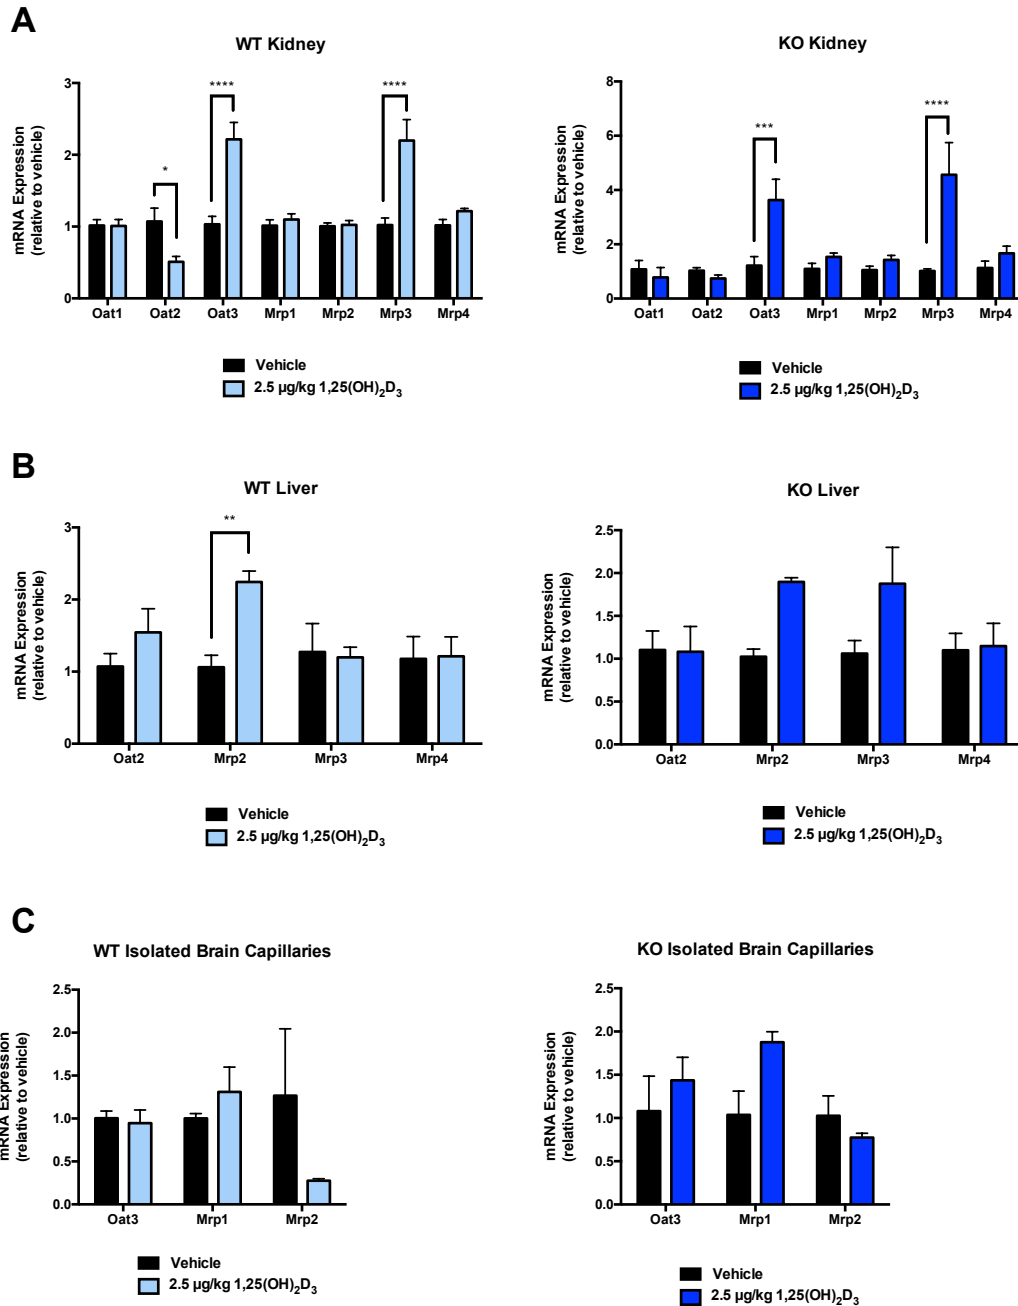

**Figure S2.** Effect of calcitriol treatment on Oat and Mrp expression in WT and Fcrl1 KO mice. (A) Significant increases in *Slc22a8* (Oat3) and *Abcc3* (Mrp3) mRNA were observed in kidney of WT and Fcrl1 KO mice treated with calcitriol (2.5 µg/kg) compared to vehicle (corn oil). (B) Significant induction of *Abcc2* (Mrp2) mRNA was also observed in liver of WT mice following calcitriol administration. (C) There were no significant changes in Oat or Mrp mRNA following treatment of WT and Fcrl1 KO mice with calcitriol. Results are presented as mean ± S.E.M. for  $n = 3$  independent experiments (total of 5-6 animals per group). Asterisks represent data point significantly different from vehicle (\*,  $p < 0.05$ ; \*\*,  $p < 0.01$ ; \*\*\*,  $p < 0.001$ ; \*\*\*\*,  $p < 0.0001$ ).

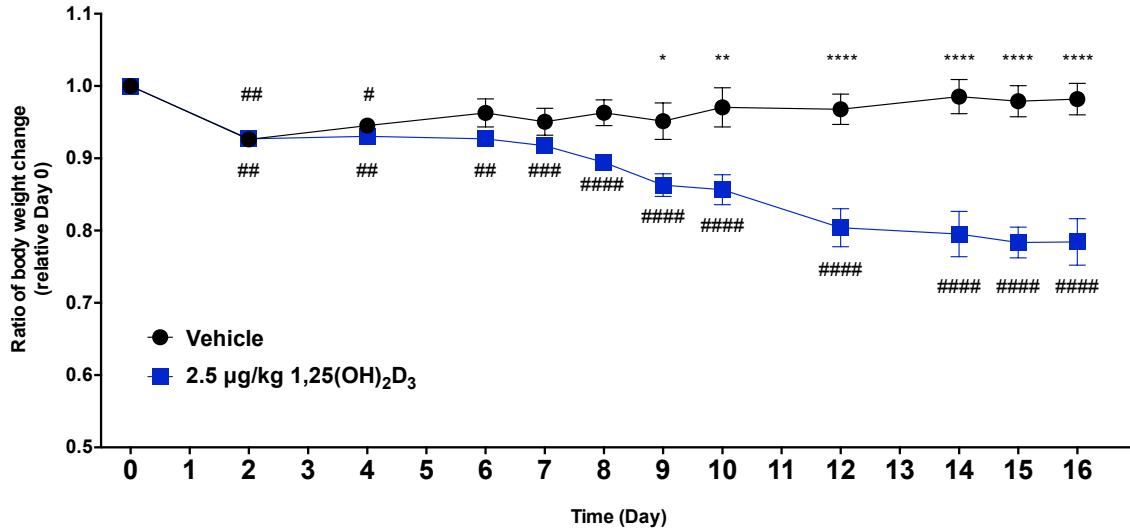

**Figure S3.** Long term effect of calcitriol treatment on body weight of WT mice. Significant weight loss was observed in mice treated with calcitriol (2.5 µg/kg) compared to vehicle (corn oil), but this weight loss seemed to plateau at the beginning of Day 12. Results are presented as mean ± S.E.M. (total of 3 animals per group). Asterisk and pound symbols represent data points significantly different from vehicle control and Day 0 (time before vehicle or calcitriol injections), respectively (\*,  $p < 0.05$ ; \*\*,  $p < 0.01$ ; \*\*\*\*,  $p < 0.0001$ ; #,  $p < 0.05$ ; ##,  $p < 0.01$ ; ###,  $p < 0.001$ ; #####,  $p < 0.0001$ ).
